# Supplementary material for: Bone marrow–derived fibroblasts are a functionally distinct stromal cell population in breast cancer
Source: PubMed Central journal article supplement — J Exp Med. 2018 Dec 3;215(12):3075–93. doi: 10.1084/jem.20180818 (PMC6279405; doi:10.1084/jem.20180818), 2018-12-03
Supplement: JEM_20180818_sm.pdf [file JEM_20180818_sm.pdf]

## Supplemental material

Raz et al., <https://doi.org/10.1084/jem.20180818>

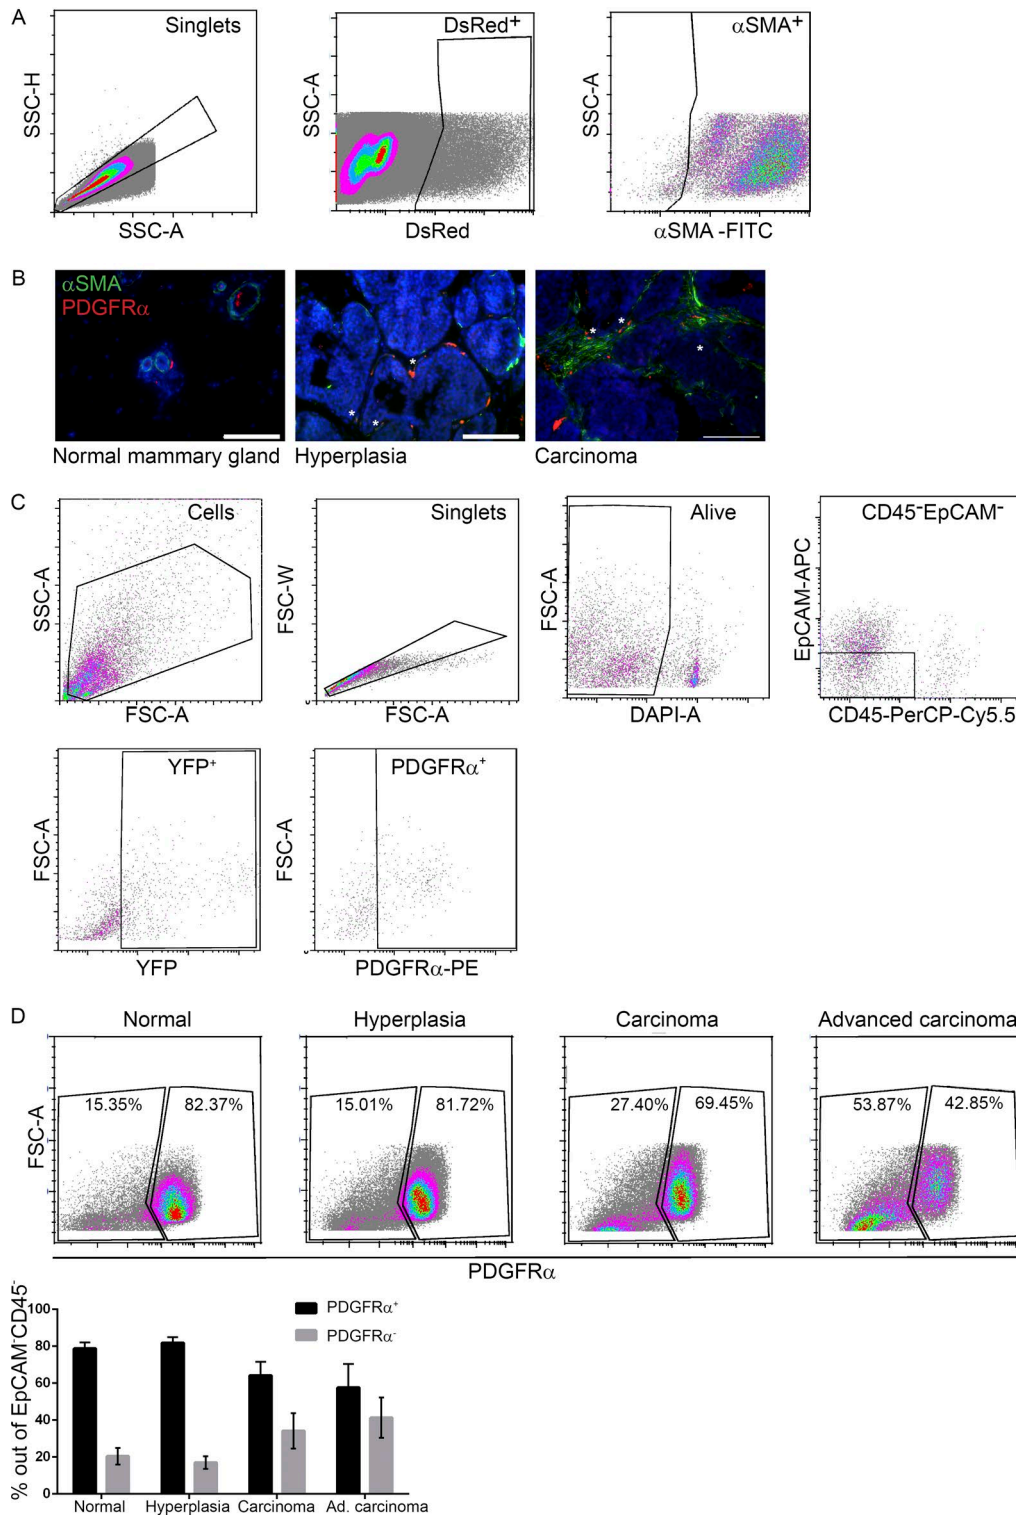

Figure S1. **The percentage of PDGFR $\alpha$ <sup>+</sup> fibroblasts in mammary tumors decreases with tumor progression.** (A) Gating strategy for flow cytometry presented in Fig. 1 C. Data were analyzed using Kaluza 1.5 Flow Analysis software (Beckman Coulter, Inc). (B) Co-staining of  $\alpha$ SMA and PDGFR $\alpha$  in normal mammary gland, hyperplasia, or carcinoma.  $n = 4$  mice at each stage; four sections/mouse were analyzed. Bars, 100  $\mu$ m. Asterisks indicate double-positive cells. (C) Gating strategy for flow cytometry presented in Fig. 1 O. Data were analyzed using Kaluza 1.5 Flow Analysis software (Beckman Coulter, Inc). (D) FACS analysis of PDGFR $\alpha$  in normal mammary glands, hyperplasia, and mammary tumors of MMTV-PyMT mice. Representative of three independent experiments. Results show mean  $\pm$  SD of biological repeats.

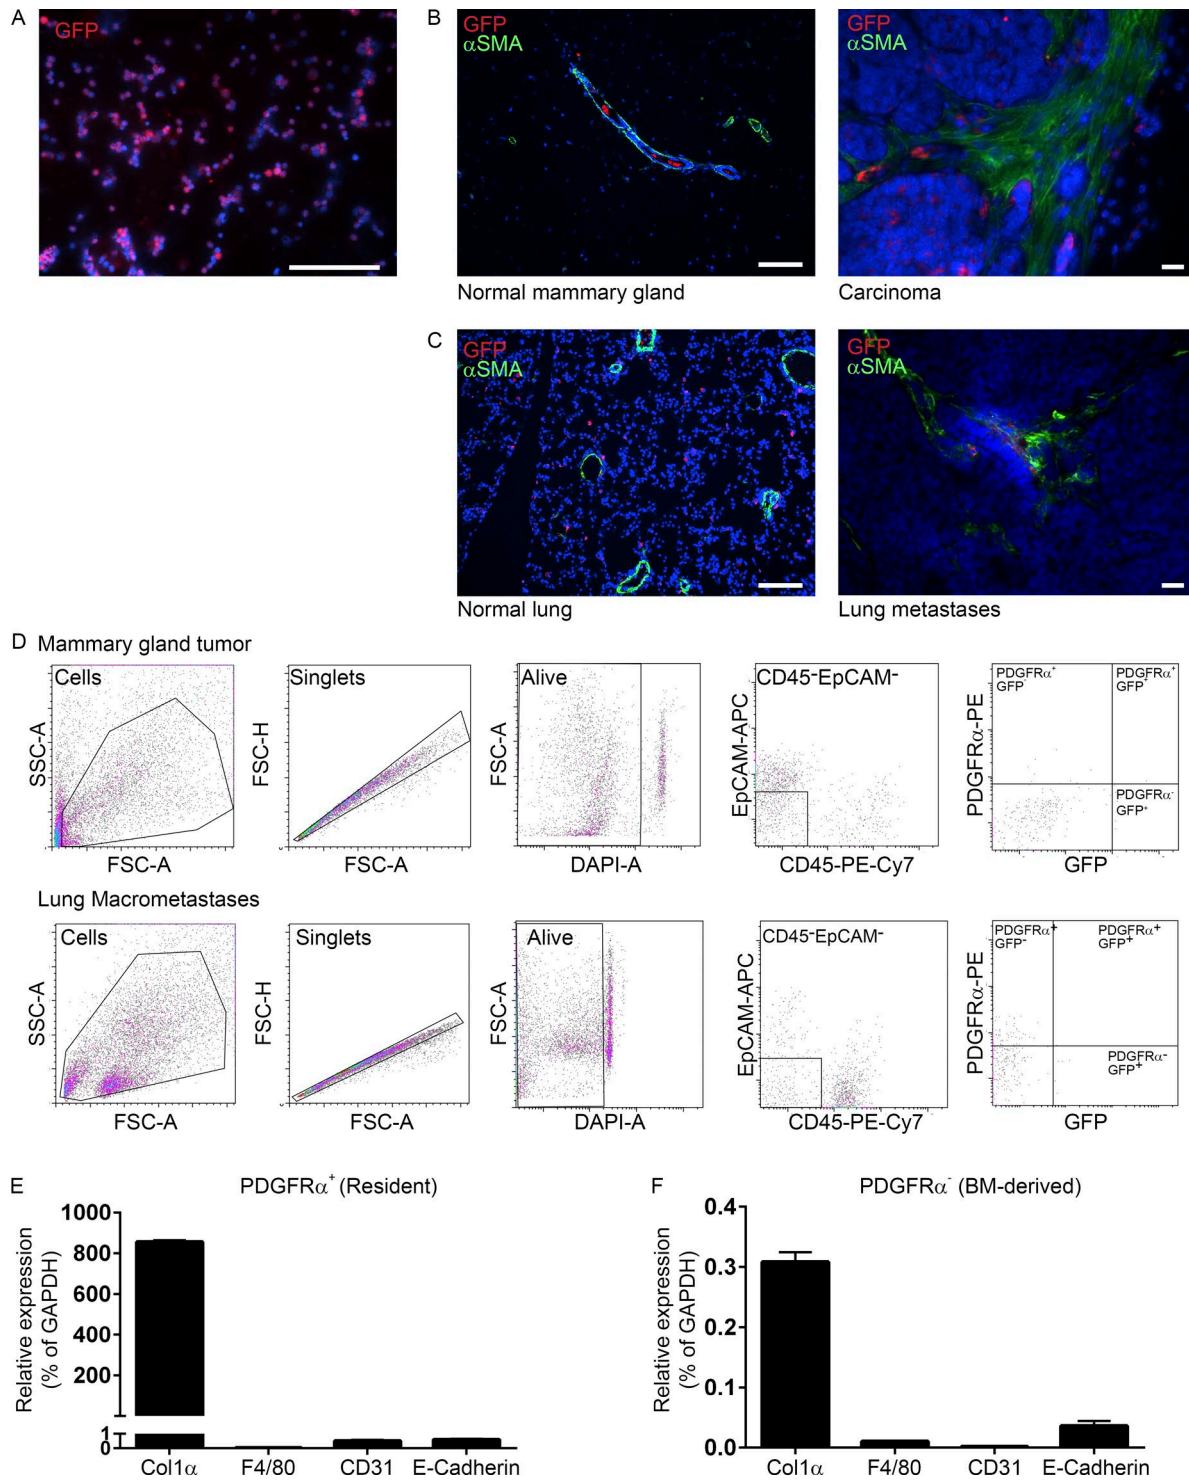

Figure S2. **A subpopulation of CAFs in mammary tumors and lung metastases are BM-derived.** (A) Immunofluorescent staining of GFP in BM smears of donor mice. BM smears from MMTV-PyMT and FVB/n recipient mice were fixed and stained. Representative image out of 18 BM smears analyzed from two separate transplantations. Cell nuclei, DAPI; GFP, Rhodamine. Bar, 100  $\mu$ m. (B) Co-staining of  $\alpha$ SMA and GFP in normal mammary glands from FVB/n recipients ( $n = 5$ ) or in mammary tumors from PyMT recipients ( $n = 5$ ). Bars, 100  $\mu$ m. (C) Co-staining as above in normal lungs from FVB/n recipients ( $n = 5$ ) and in lung macrometastases in PyMT recipients ( $n = 7$ ). Bars, 100  $\mu$ m. (D) FACS gating strategy for flow cytometry presented in Fig. 2 (B and E). Data were analyzed using Kaluza 1.5 Flow Analysis Software (Beckman Coulter, Inc). (E and F) qRT-PCR analysis of characteristic cell markers for macrophages (F4/80), epithelial cells (E-Cadherin), and endothelial cells (CD31) was performed on resident PDGFR $\alpha^+$ GFP $^-$  (E) and BM-derived PDGFR $\alpha^-$ GFP $^+$  (F) cell populations. Results were normalized to GAPDH. Error bars represent SD of technical repeats.  $n = 9$ .

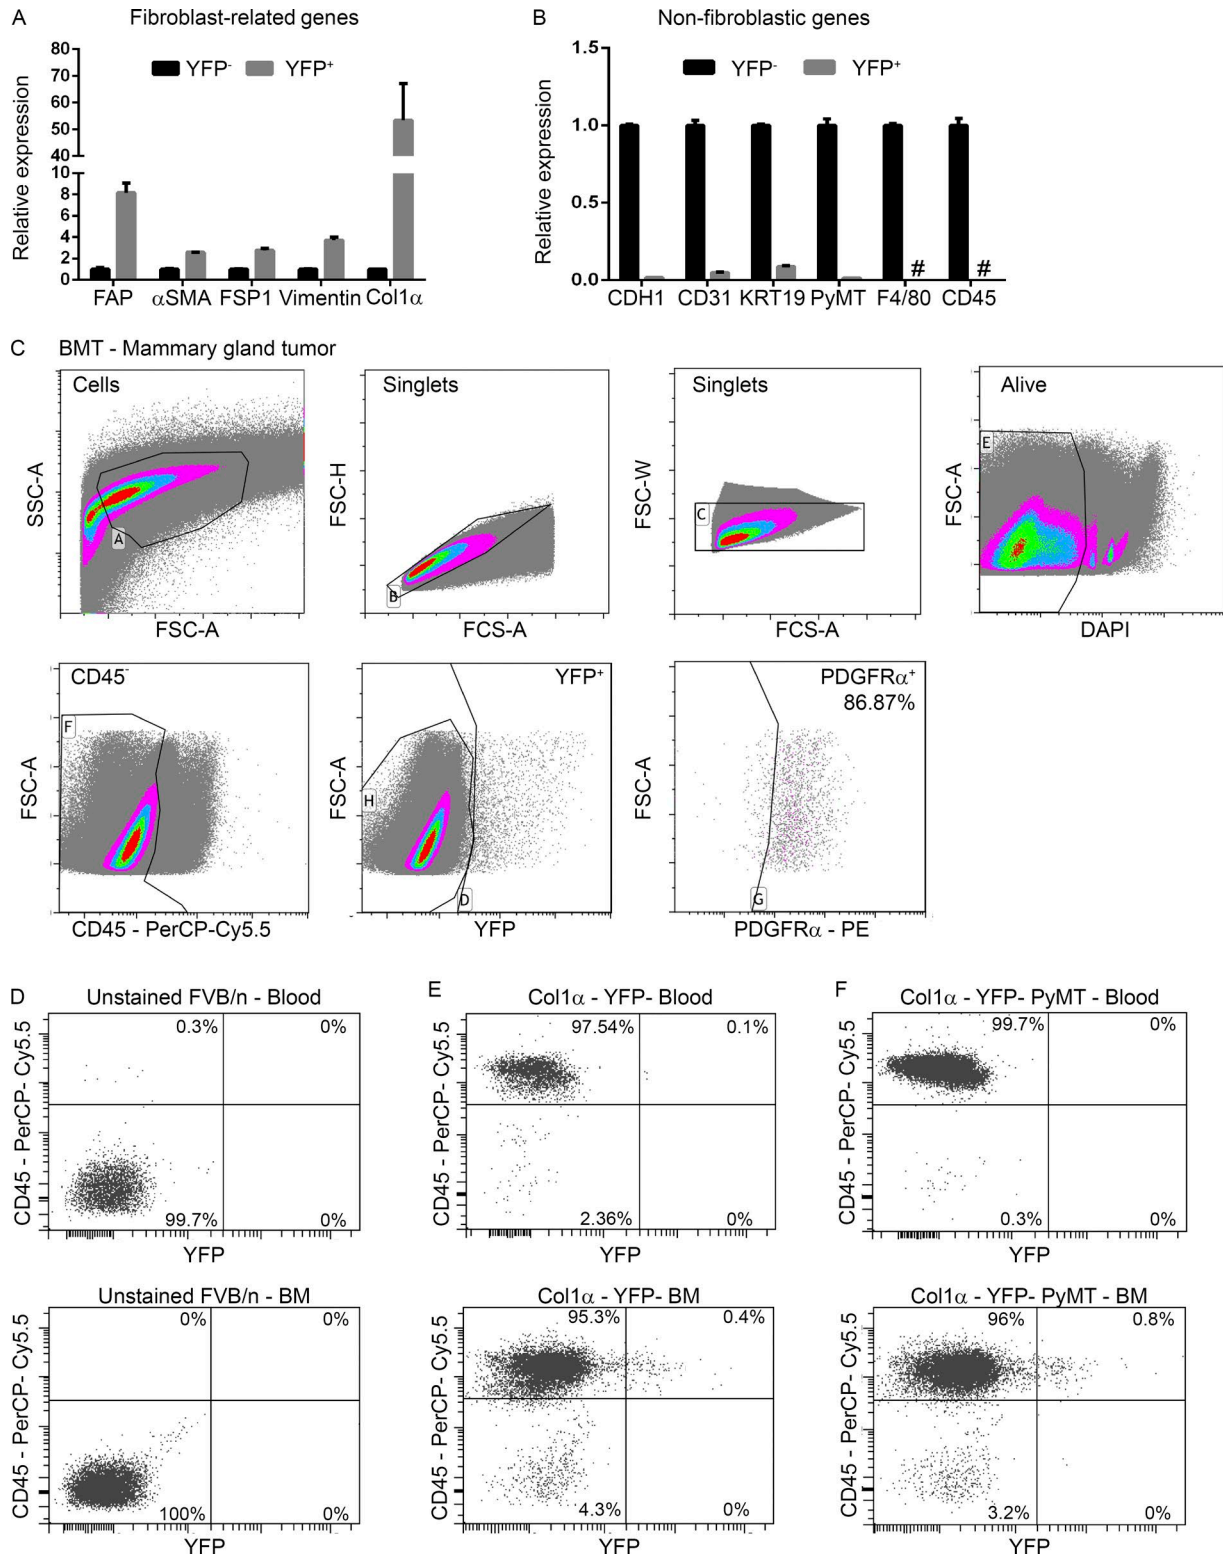

Figure S3. **Col1 $\alpha$  labels all fibroblasts, while PDGFR $\alpha$  is specific for resident fibroblasts.** (A and B) qRT-PCR expression analysis of fibroblastic (A) and nonfibroblastic (B) markers in EpCAM<sup>-</sup>CD45<sup>-</sup> cells isolated from mammary tumors of female PyMT;Col1 $\alpha$ -YFP mice ( $n = 2$ ). Error bars represent SD of technical repeats. #, undetected. (C) FACS analysis and gating strategy of PDGFR $\alpha$  in resident (YFP<sup>+</sup>) CAFs in the BM transplantation described in Fig. 2 H. (D-F) Col1 $\alpha$ <sup>+</sup> nonhematopoietic cells are not detected in peripheral blood or in the BM. FACS analysis of peripheral blood (upper panel) and BM (lower panel) of unstained control (D), Col1 $\alpha$ -YFP (E), and PyMT;Col1 $\alpha$ -YFP (F) female mice. Representative of four mice analyzed from two independent experiments.

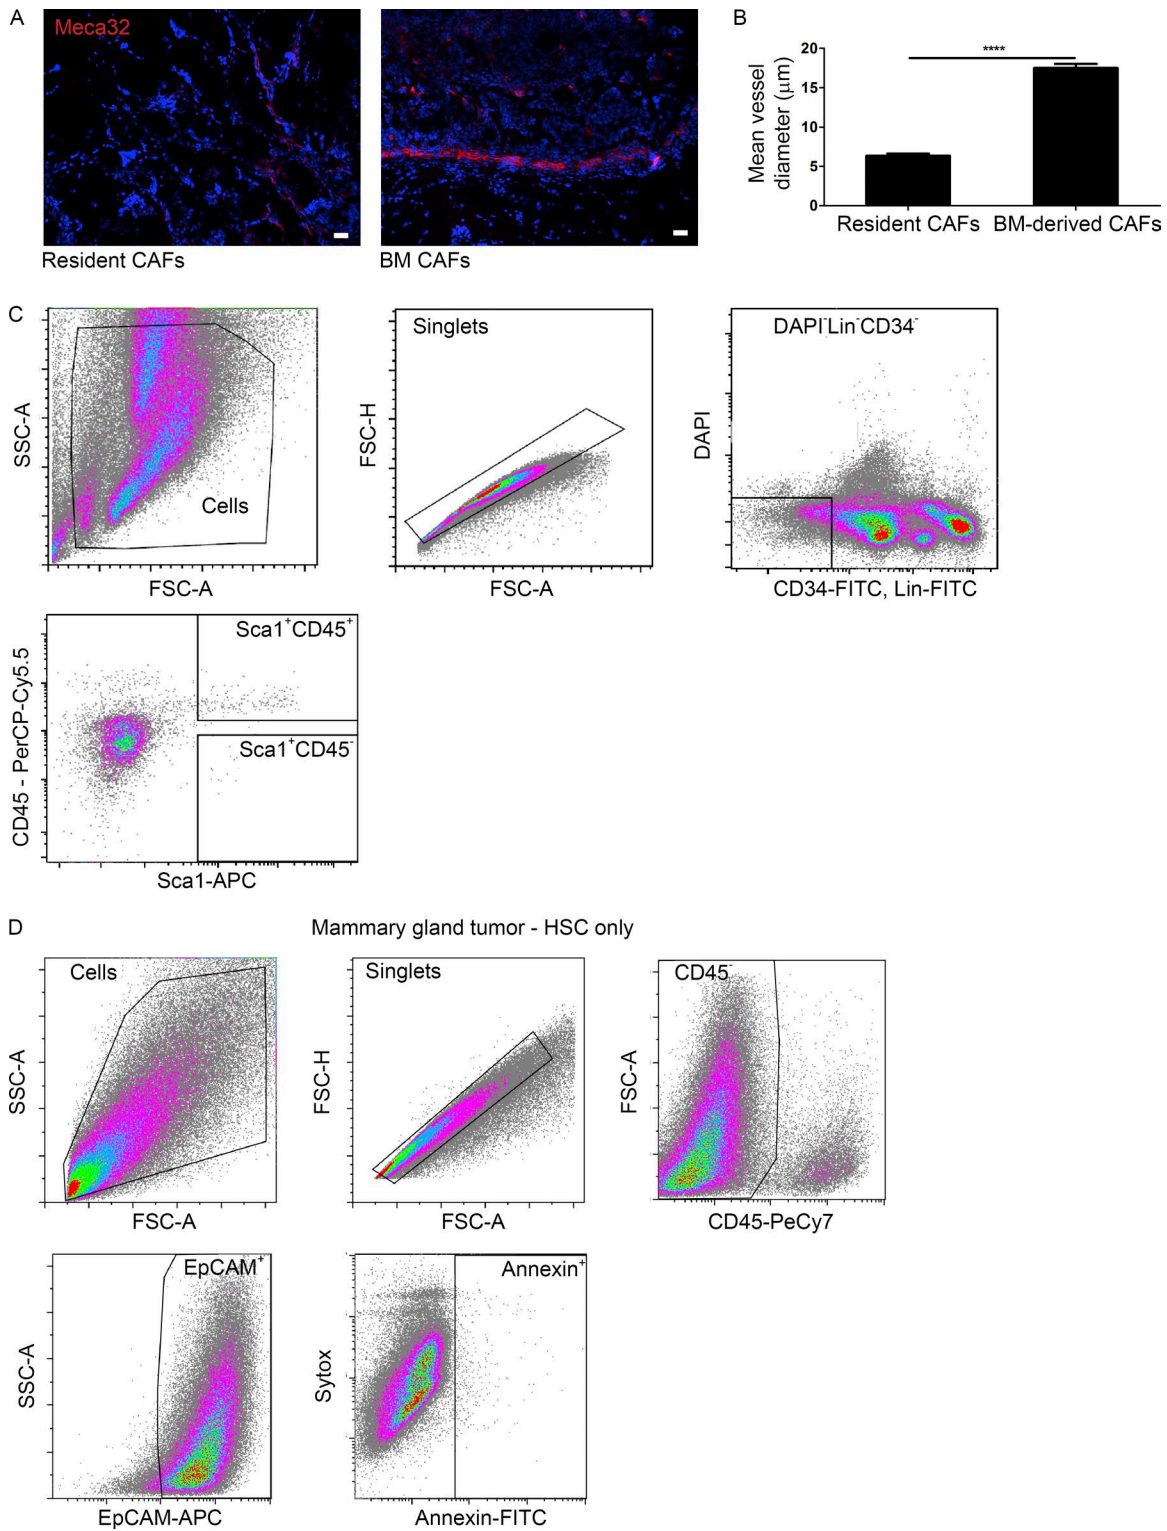

Figure S4. **BM-derived PDGFR $\alpha$ <sup>-</sup> CAFs induce the formation of larger blood vessels as compared with PDGFR $\alpha$ <sup>+</sup> resident CAFs.** (A) BM-derived PDGFR $\alpha$ <sup>-</sup> CAFs induce the formation of larger blood vessels as compared with PDGFR $\alpha$ <sup>+</sup> resident CAFs. Immunostaining of Meca32 in plugs described in Fig. 4 D. Experiments were repeated twice.  $n = 4$ . 5 sections per plug were stained and 5 fields per section were analyzed using the ImageJ software for a total of 100 fields per cell type. Bars, 30  $\mu\text{m}$ . (B) Quantification of staining presented in A, performed with ImageJ software. Error bars represent SEM. \*\*\*\*,  $P < 0.00001$ ; two-tailed Mann-Whitney test. (C) Gating strategy for isolation of HSCs and MSCs used for BMT described in Fig. 5 A. (D) Gating strategy for flow cytometry presented in Fig. 5 E. Data were analyzed using Kaluza 1.5 Flow Analysis Software (Beckman Coulter, Inc).

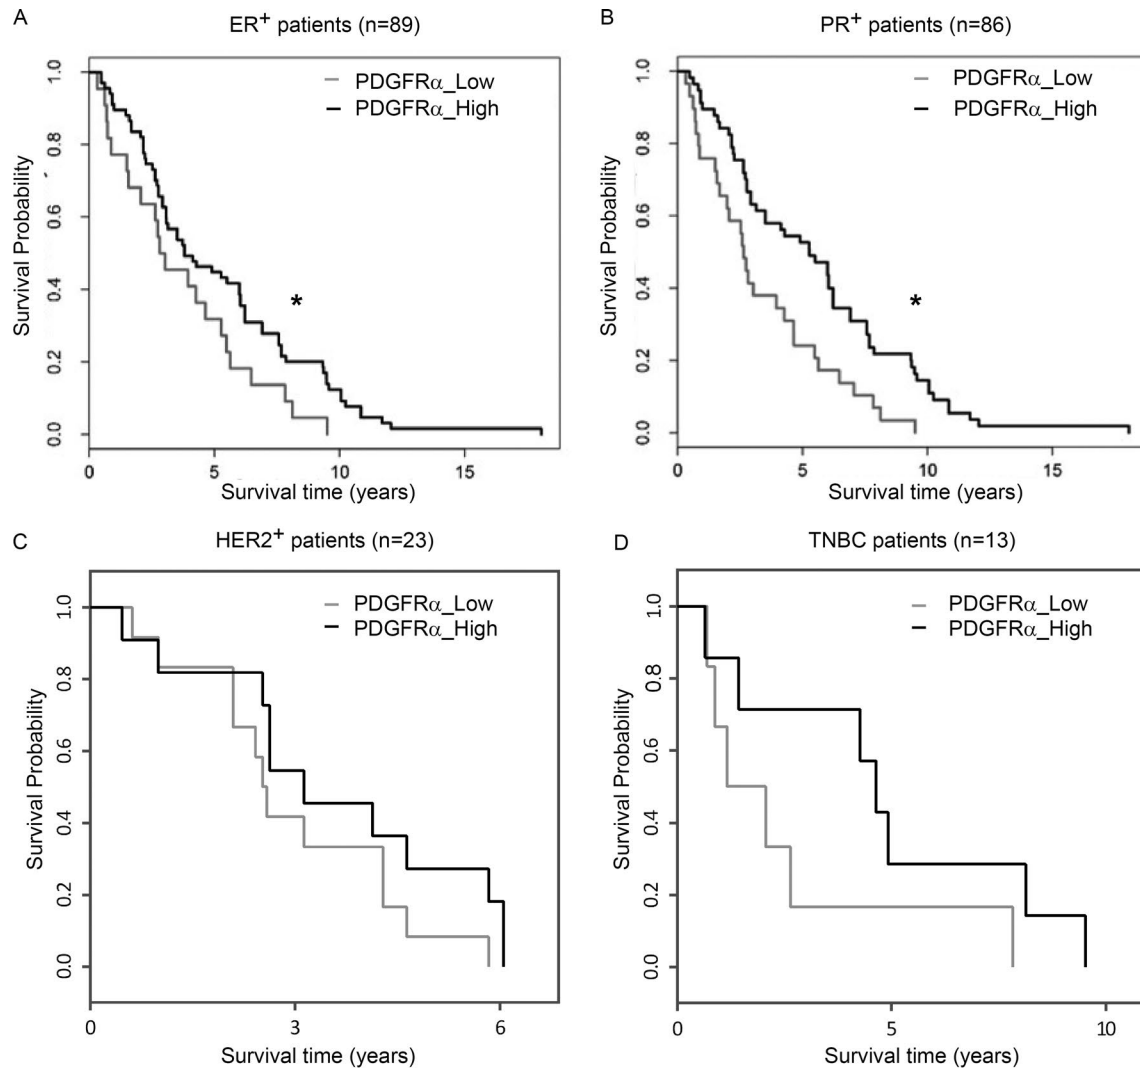

**E** Details of cancer data sets

|    | Short name | Cancer name                   | Normal samples (n) | Cancer samples (n) | Total samples (n) |
|----|------------|-------------------------------|--------------------|--------------------|-------------------|
| 1  | Bladder    | Bladder urothelial Ca         | 16                 | 182                | 198               |
| 2  | Breast     | Breast invasive Ca            | 79                 | 649                | 728               |
| 3  | Colon      | Colon adenoCa                 | 10                 | 230                | 240               |
| 4  | Head&Neck  | Head&Neck SCC                 | 20                 | 303                | 323               |
| 5  | Kidney     | Kidney papillary cell Ca      | 23                 | 125                | 148               |
| 6  | Lung       | Lung SCC                      | 8                  | 354                | 362               |
| 7  | Prostate   | Prostate adenoCa              | 30                 | 195                | 225               |
| 8  | Rectal     | Rectal adenoCa                | 1                  | 82                 | 83                |
| 9  | Thyroid    | Thyroid Ca                    | 49                 | 486                | 535               |
| 10 | Uterine    | Uterine corpus endometroid Ca | 17                 | 118                | 135               |

Ca - carcinoma. AdenoCa - Adenocarcinoma. SCC - Squamous cell carcinoma.

Figure S5. **Decreased PDGFR $\alpha$  in human tumors correlates with worse prognosis in different subtypes of human breast cancer. (A–D)** Kaplan-Meier plot for survival rates at high and low expression levels of PDGFR $\alpha$  compared with the median expression (black and gray curves, respectively). Pre-processed and normalized RNA-seq gene expression data from the new TCGA were analyzed ( $n = 89$  for PR $^+$  patients [A];  $n = 86$  for ER $^+$  [B];  $n = 13$  for TNBC [C];  $n = 23$  for HER2 $^+$  patients [D]). \*,  $P < 0.05$ ;  $\chi^2$  test. ER, estrogen receptor; PR, progesterone receptor; TNBC, triple-negative breast cancer. **(E)** Details of cancer datasets. All datasets were derived from TCGA database.
